# Supplementary material for: Influence of NO and (NO)2 adsorption on the properties of Fe-N4 porphyrin-like graphene sheets
Source: Royal Society of Chemistry journal article supplement (doi:10.1039/c6cp07898b), 2017-01-01
Supplement: c6cp07898b1.pdf [file c6cp07898b1.pdf]

*Supplementary Information for manuscript*

**Influence of NO and (NO)<sub>2</sub> Adsorption on the Properties of Fe-N<sub>4</sub>  
Porphyrin-Like Graphene Sheet**

Elham Ashori<sup>1</sup>, Fariba Nazari<sup>1,2\*</sup>, Francesc Illas<sup>3\*</sup>

<sup>1</sup>*Department of Chemistry, Institute for Advanced Studies in Basic Sciences, Zanjan 45137-66731, Iran*

<sup>2</sup>*Center of Climate Change and Global Warming, Institute for Advanced Studies in Basic Sciences, Zanjan 45137-66731, Iran*

<sup>3</sup>*Departament de Ciència de Materials i Química Física & Institut de Química Teòrica i Computacional (IQTCUB), Universitat de Barcelona, C/Martí i Franquès 1, 08028 Barcelona, Spain*

### Definition of the various defects studied in the present work

On the graphene supercell considered in the present work, defect formation can be represented through Eq. (S1)

$$C_{60} + \frac{x}{2}N_2 + TM \rightarrow C_{60-x-y}N_xTM + (x+y)C \quad (S1),$$

whereas the formation energy is computed as in Eq. (S2)

$$\Delta E = E_{C_{60-x-y}N_xTM} + (x+y)\mu_C - [E_{C_{60}} + x\mu_N + E_{TM(g)}] \quad (S2),$$

and the binding energy of a transition metal atom to the P-N4 structure is as in Eq. (S3)

$$BE = E_{C_{60-x-y}N_xTM} - [E_{C_{60-x-y}N_x} + E_{TM(g)}] \quad (S3).$$

The meaning of the various quantities in Eqs. S1-S3 is as for Eqs. 1-3 in the main text.

Results concerning  $\Delta E$  and  $BE$  for the various defects studied in the present work are summarized in Tables S1 to S5 where comparison to available previous results is included for comparison

**Table S1**

Defect formation energies ( $\Delta E$  in eV) and magnetic moments (m in  $\mu_B$ ) of in-plane defects in Graphene. Notation is as in the main text. Values in parentheses correspond to the reference [1].

| Defect     | DV             | Py-N           | P-N3           | P-N4           | G-Fe-N4          |
|------------|----------------|----------------|----------------|----------------|------------------|
| $\Delta E$ | 8.06<br>(8.51) | 5.82<br>(5.88) | 3.64<br>(3.53) | 4.05<br>(3.99) | -2.98<br>(-3.09) |
| m          | 0.00<br>(0.00) | 1.00<br>(1.00) | 0.50<br>(0.46) | 0.00<br>(0.00) | 2.00<br>(2.00)   |

**Table S2**

Binding energy (BE in eV) and bond lengths (d in Å) for the optimized equilibrium geometry of G-Fe-N4. C1 and C2 correspond to carbon atom of rings five and six for Fe-N4 defect, respectively.

|         | BE                 | $d_{Fe-N}$        | $d_{N-C1}$        | $d_{N-C2}$        |
|---------|--------------------|-------------------|-------------------|-------------------|
| G-Fe-N4 | -7.73<br>-7.07 [1] | 1.89<br>1.900 [2] | 1.38<br>1.380 [2] | 1.39<br>1.392 [2] |

**Table S3**

Calculated and available experimental structure parameters of acyclic cis-ONNO ( $^1A_1$ ,  $^3A_1$ ) and trans-ONNO ( $^1A_1$ ,  $^3A_1$ ) and cyclic rectangular ONON ( $^1A_1$ ,  $^3A_1$ ). Distances (d) are in Å and angles in degrees.

|                                        | $d_{N-N}$                                        | $d_{N-O}$                                         | $\angle(\text{ONN})$                            | $\angle(\text{ONO})$ | $d_{N-O}^a$<br>$d_{N-O}^b$ |
|----------------------------------------|--------------------------------------------------|---------------------------------------------------|-------------------------------------------------|----------------------|----------------------------|
|                                        | 2.03                                             | 1.17                                              | 100.4                                           |                      |                            |
| <b>cis-ONNO (<math>^1A_1</math>)</b>   | 2.013 <sup>c</sup> [3]<br>2.263 <sup>d</sup> [4] | 1.176 <sup>c</sup> [3]<br>1.1515 <sup>d</sup> [4] | 98.5 <sup>c</sup> [3]<br>97.17 <sup>d</sup> [4] | –                    | –                          |
|                                        | 1.99                                             | 1.17                                              | 111.0                                           |                      |                            |
| <b>cis-ONNO (<math>^3A_1</math>)</b>   | 1.917 <sup>c</sup> [3]<br>2.237 <sup>d</sup> [5] | 1.180 <sup>c</sup> [3]<br>1.161 <sup>d</sup> [5]  | 108.8 <sup>c</sup> [3]<br>99.6 <sup>d</sup> [5] | –                    | –                          |
|                                        | 1.21                                             | 1.22                                              | 145.1                                           |                      |                            |
| <b>trans-ONNO (<math>^1A_1</math>)</b> | 1.864 <sup>c</sup> [3]                           | 1.182 <sup>c</sup> [3]                            | 106.6 <sup>c</sup> [3]                          | –                    | –                          |
|                                        | 1.96                                             | 1.17                                              | 114.0                                           |                      |                            |
| <b>trans-ONNO (<math>^3A_1</math>)</b> | 1.830 <sup>c</sup> [3]                           | 1.183 <sup>c</sup> [3]                            | 111.6 <sup>c</sup> [3]                          | –                    | –                          |
|                                        |                                                  |                                                   |                                                 | 85.4                 | 1.16 <sup>a</sup>          |
| <b>ONON (<math>^1A_1</math>)</b>       | –                                                | –                                                 | –                                               | 90.0                 | 2.28 <sup>b</sup>          |
|                                        |                                                  |                                                   |                                                 | 85.9                 | 1.16 <sup>a</sup>          |
| <b>ONON(<math>^3A_1</math>)</b>        | –                                                | –                                                 | –                                               | 86.3                 | 2.44, 2.45 <sup>b</sup>    |

<sup>a</sup> Short NO bond length in the cyclic parallelogram structure.  
<sup>b</sup> Long NO bond length in the cyclic parallelogram structure  
<sup>c</sup> Predicted by DFT based calculations with the PBE functional  
<sup>d</sup> Experimental values

**Table S4**

The adsorption energies ( $E_{\text{ads}}$ ), dimer formation energies ( $E_{\text{dim}}$ ), reconstruction energies ( $E_{\text{rec}}$ ) and binding energies ( $E_{\text{bin}}$ ) of adsorption complex (ACII<sub>1</sub>-ACII<sub>5</sub>). Values in parenthesis correspond to results without dispersion terms. All values are in eV.

|                  | ACII <sub>1</sub> | ACII <sub>2</sub> | ACII <sub>3</sub> | ACII <sub>4</sub> | ACII <sub>5</sub> |
|------------------|-------------------|-------------------|-------------------|-------------------|-------------------|
| $E_{\text{ads}}$ | -3.20             | -2.91             | -2.31             | -1.84             | -4.89             |
|                  | (-2.86)           | (-2.61)           | (-2.10)           | (-1.58)           | (-4.61)           |
| $E_{\text{dim}}$ | -2.12             | -0.51             | -0.17             | -0.45             | –                 |
|                  | (-1.98)           | (-0.34)           | (-0.11)           | (-0.33)           |                   |
| $E_{\text{rec}}$ | 0.89              | 0.74              | 0.44              | 0.23              | 1.38              |
|                  | (0.90)            | (0.76)            | (0.45)            | (0.25)            | (1.45)            |

**Table S5**

Bond lengths (d in Å) and magnetic moments (m in  $\mu_{\text{B}}$ ) of NO dimer adsorbed on the G-Fe-N4 in five stable configurations (ACII<sub>1</sub>- ACII<sub>5</sub>).  $\Delta z$  is the out-of-plane dislocation of the metal atom in Å. Values in parenthesis correspond to results without dispersion terms. C1 stands for the carbon atom of ring five.

|                   | $d_{\text{Fe-N}}$                                    | $d_{\text{N-C1}}$        | $d_{\text{N-C2}}$        | $d_{\text{N-N}}$ | $d_{\text{N1-O1}}, d_{\text{N2-O2}}$<br>$d_{\text{N1-O2}}, d_{\text{N2-O1}}$ | $d_{\text{Fe-X}}$<br>$\text{X=O,N}$ | m              | $\Delta z$     |
|-------------------|------------------------------------------------------|--------------------------|--------------------------|------------------|------------------------------------------------------------------------------|-------------------------------------|----------------|----------------|
| ACII <sub>1</sub> | 1.92,1.94,1.95,<br>1.96<br>(1.92,1.94,1.95,<br>1.96) | 1.36,1.37<br>(1.36,1.37) | 1.38,1.39<br>(1.38,1.39) | 1.28<br>(1.28)   | 1.25,1.38<br>(1.25,1.38)                                                     | $d_{\text{Fe-O}}$<br>1.92<br>(1.92) | 0.0<br>(0.0)   | 0.52<br>(0.53) |
| ACII <sub>2</sub> | 1.93,1.94,1.95<br>(1.94,1.95)                        | 1.37<br>(1.37)           | 1.38,1.39<br>(1.38,1.39) | 1.27<br>(1.27)   | 1.25, 1.25<br>(1.25, 1.25)                                                   | $d_{\text{Fe-N}}$<br>1.91<br>(1.92) | 1.00<br>(1.00) | 0.48<br>(0.49) |
| ACII <sub>3</sub> | 1.94, 1.92<br>(1.94, 1.92)                           | 1.37<br>(1.37)           | 1.38<br>(1.38)           | –                | 1.19, 1.17<br>2.86, 2.76<br>(1.19,1.17<br>2.94,2.91)                         | $d_{\text{Fe-N}}$<br>1.68<br>(1.68) | 1.50<br>(1.50) | 0.39<br>(0.40) |
| ACII <sub>4</sub> | 1.90,1.91<br>(1.90,1.91,1.92)                        | 1.37<br>(1.37)           | 1.39<br>(1.39)           | 1.94<br>(1.94)   | 1.20, 1.16<br>(1.20,1.16)                                                    | $d_{\text{Fe-N}}$<br>1.75<br>(1.75) | 0.0<br>(0.0)   | 0.31<br>(0.32) |
| ACII <sub>5</sub> | 1.96, 2.02<br>(1.96, 1.97,<br>2.02)                  | 1.37<br>(1.37)           | 1.38<br>(1.38)           | 1.25<br>(1.25)   | 1.36, 1.36<br>(1.36,1.36)                                                    | $d_{\text{Fe-O}}$<br>1.90<br>(1.90) | 1.00<br>(1.00) | 0.66<br>(0.66) |

**TableS6**

Bond lengths (Å) and bond angle (°) for N<sub>2</sub>O, N<sub>2</sub> and O<sub>2</sub>. Values in parentheses correspond to experiment.

| <b>Molecules</b>      | <b>d<sub>N-N</sub></b> | <b>d<sub>N-O</sub></b> | <b>d<sub>O-O</sub></b> | <b>∠ONN</b>        |
|-----------------------|------------------------|------------------------|------------------------|--------------------|
| <b>N<sub>2</sub>O</b> | 1.14, (1.129) [6]      | 1.20, (1.188) [6]      | -                      | 180.0, (180.0) [6] |
| <b>N<sub>2</sub></b>  | 1.11, (1.098) [7]      | -                      | -                      | -                  |
| <b>O<sub>2</sub></b>  | -                      | -                      | 1.23, (1.208) [7]      | -                  |

**Fig. S1** Configurations (a) pristine graphene, (b) double vacancy (DV), (c) pyrrolic N (Py-N), (d) pyridinic N3 (P-N3), (e) pyridinic N4 (P-N4) and (f) G-Fe-N4.

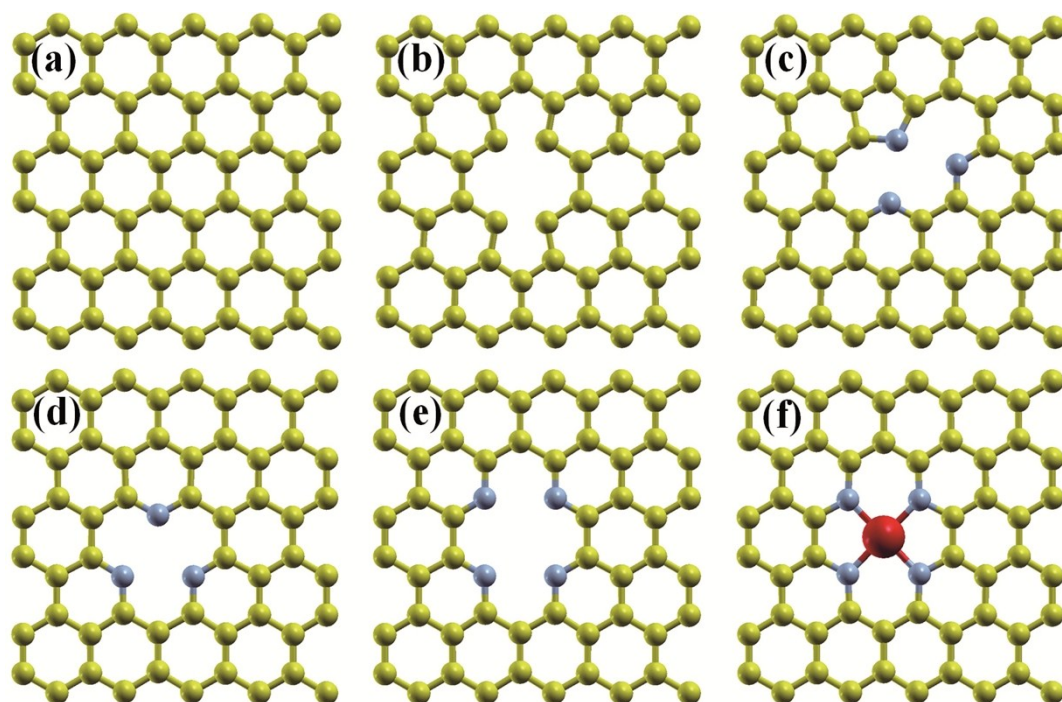

**Fig. S2** Spin-resolved (a) band structures, (b) DOS, (c) LDOS of four N atom, ten carbon atoms and Fe atom, (d) PDOS of Fe atom, and (e) PDOS of N atom and (f) spin density plot for G-Fe-N4 surface. (The arrows denote majority spin ( $\uparrow$ ) and minority spin ( $\downarrow$ ) states.)

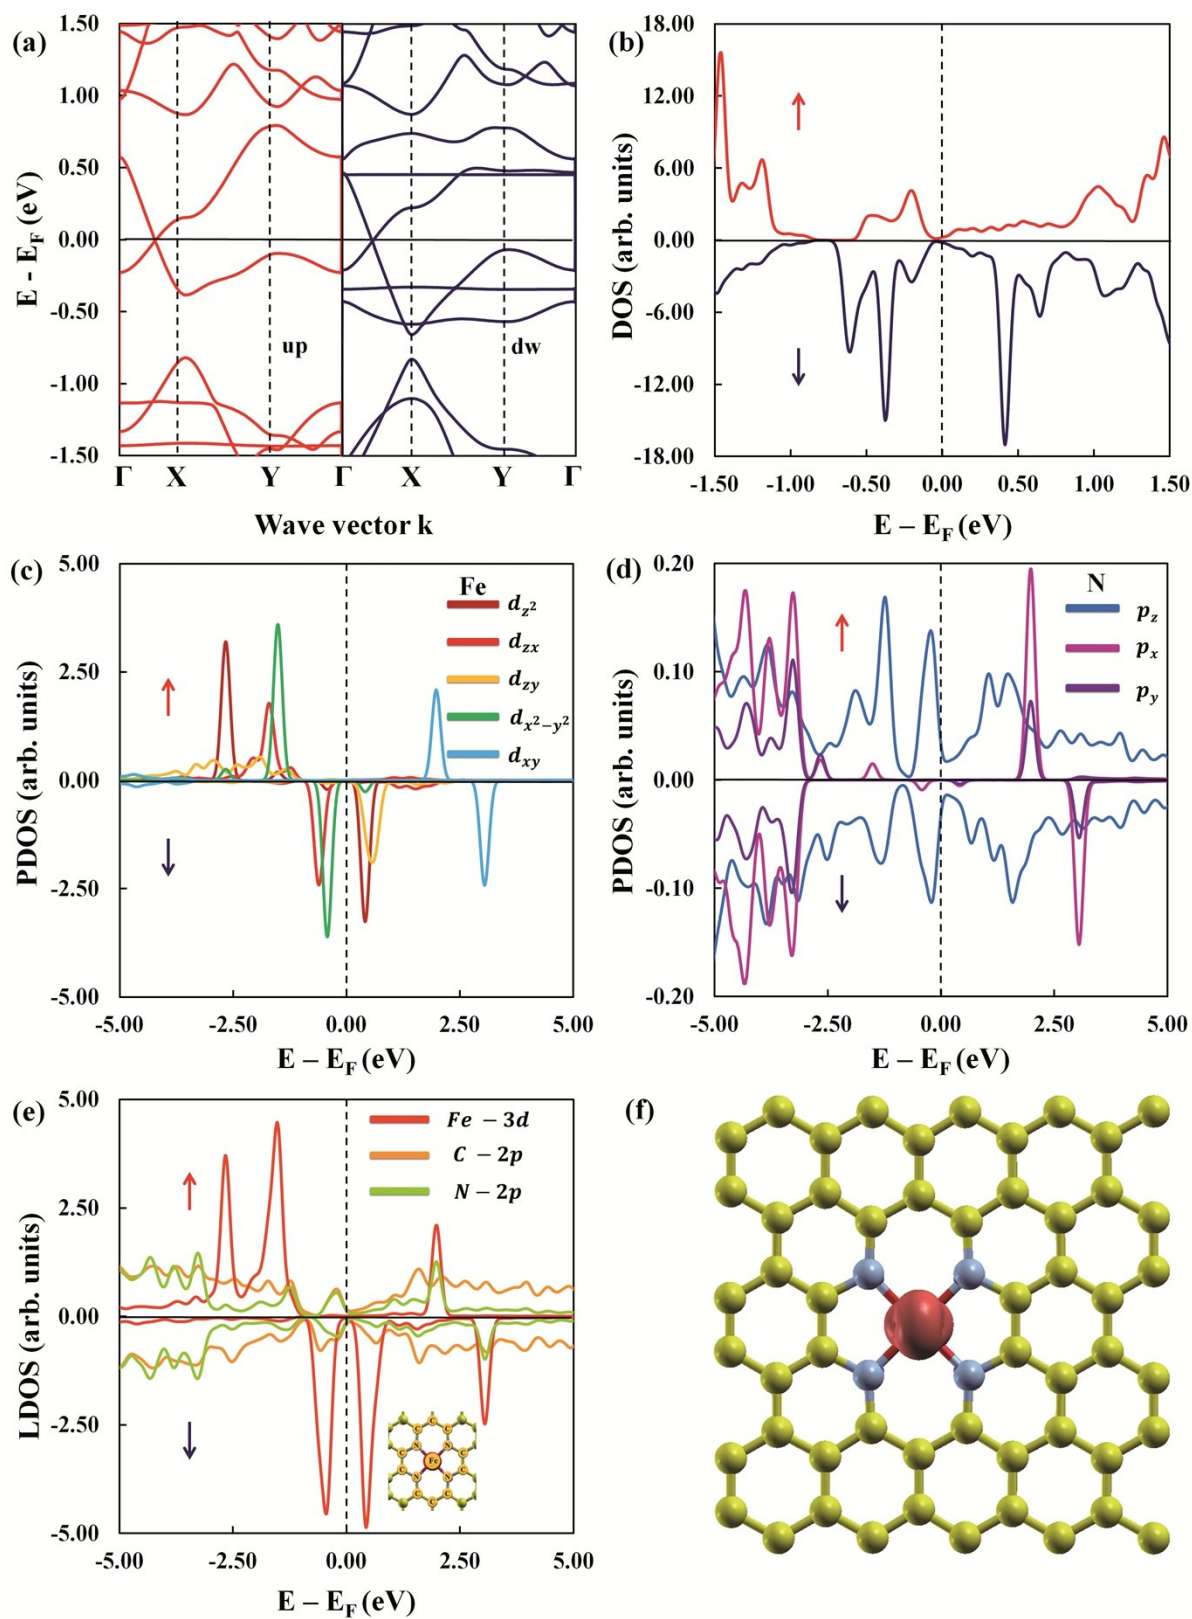

**Fig. S3** Spin-resolved (a) DOS, (b) spin density plot (c) PDOS of N atom and (d) PDOS of O atom for NO molecule. (The arrows denote majority spin ( $\uparrow$ ) and minority spin ( $\downarrow$ ) states.)

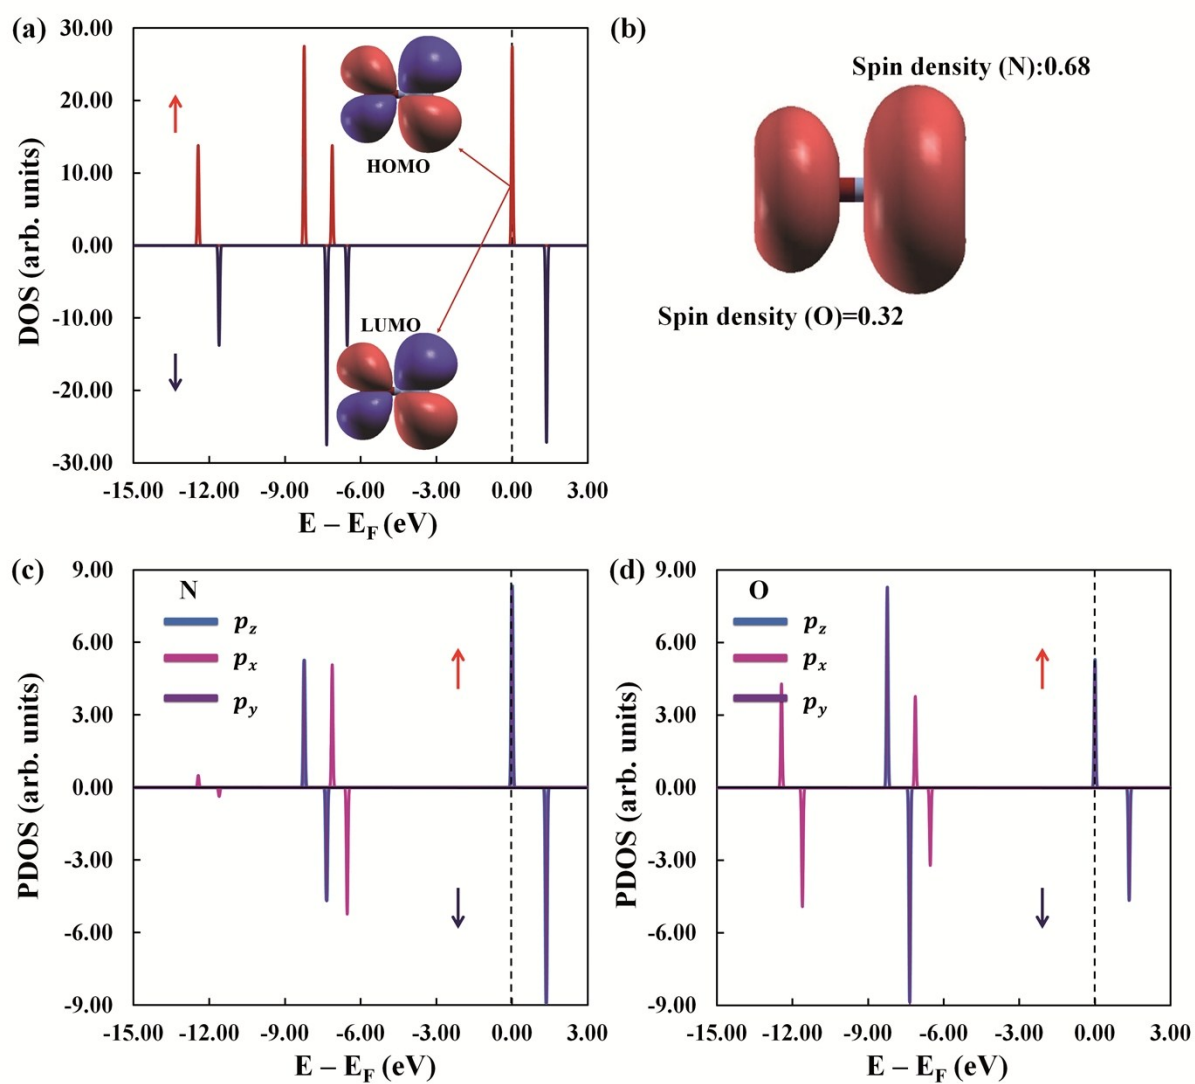



**Fig. S4** Optimized geometries of possible ground states for the NO dimer (a) acyclic cis-ONNO ( $^1A_1$ ), (b) acyclic cis-ONNO ( $^3A_1$ ), (c) acyclic trans-ONNO ( $^1A_1$ ), (d) acyclic trans-ONNO ( $^3A_1$ ), (e) cyclic NONO ( $^1A_1$ ; rectangle), and (f) cyclic NONO ( $^3A_1$ ; rectangle).

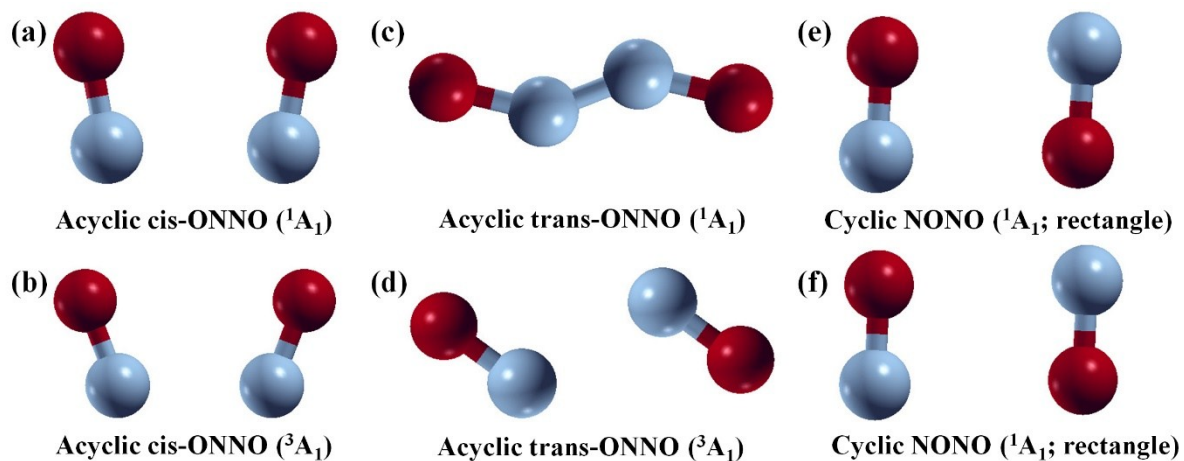

**Fig. S5** Binding energy of optimized geometries of possible ground states for the isolated  $(NO)_2$  dimer.

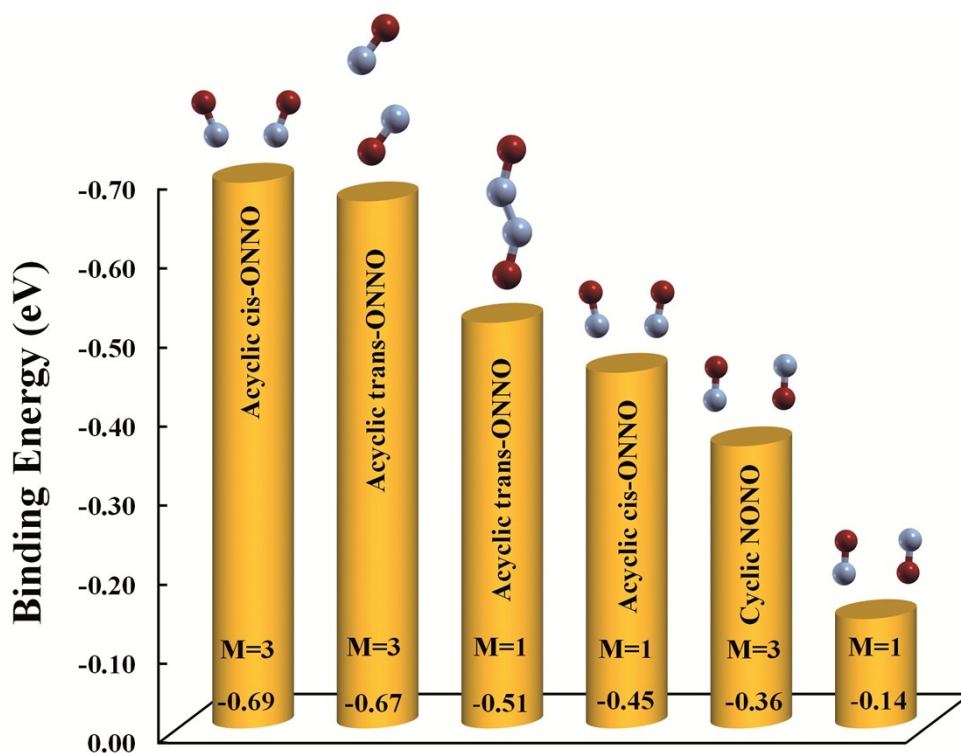

**Fig. S6** Spin-resolved (a) DOS, (b) spin density (c) PDOS of O atom and (d) PDOS of N atom for acyclic cis-ONNO ( $^3A_1$ ). (The arrows denote majority spin ( $\uparrow$ ) and minority spin ( $\downarrow$ ) states.).

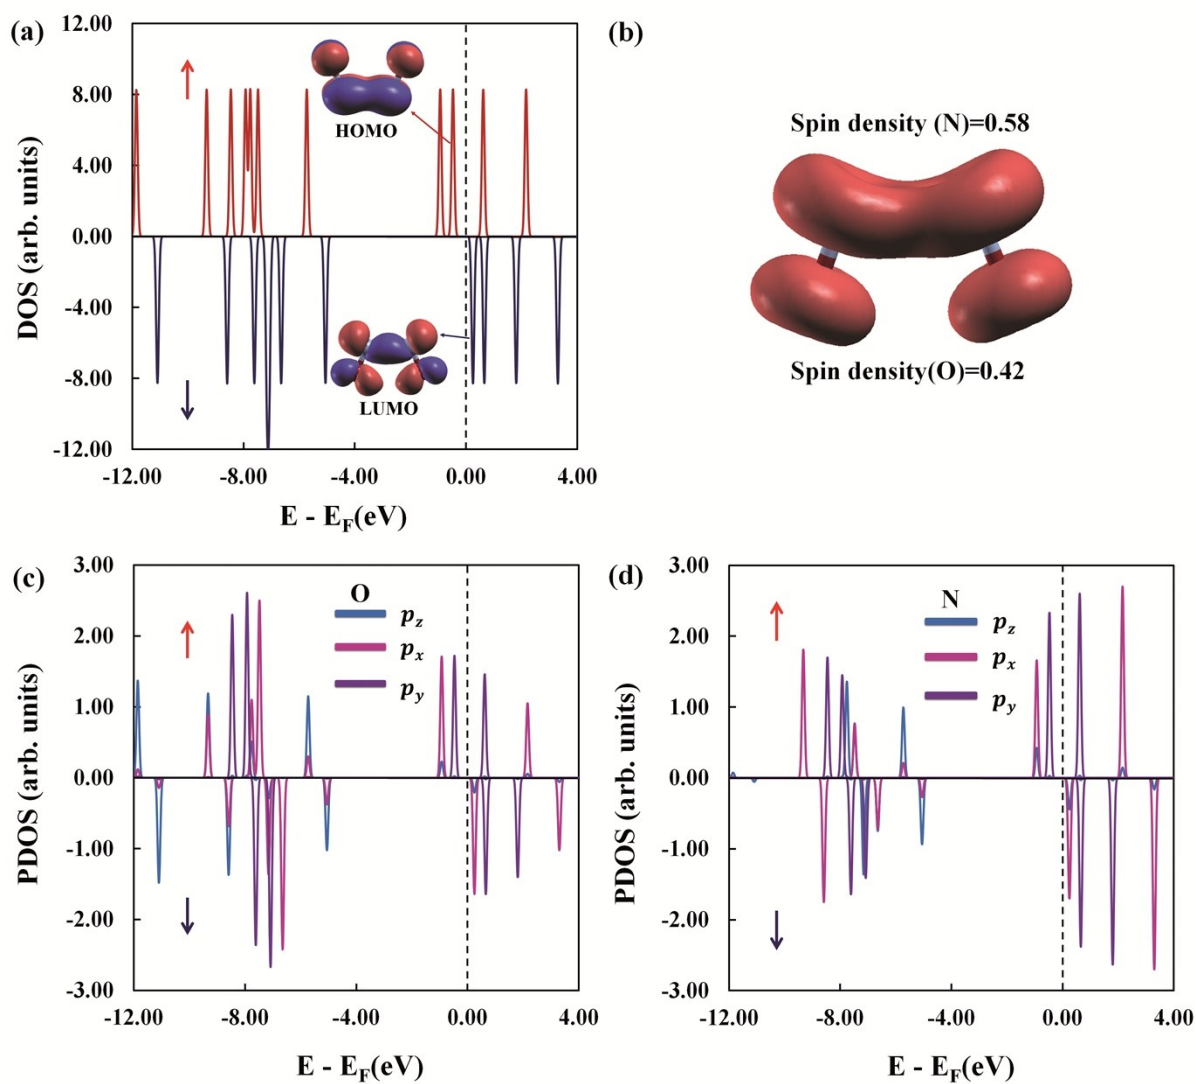

**Fig. S7** Adsorption energies of NO molecule on pristine graphene (Gr), pyridinic N4 (P-N4), and G-Fe-N4 surfaces.

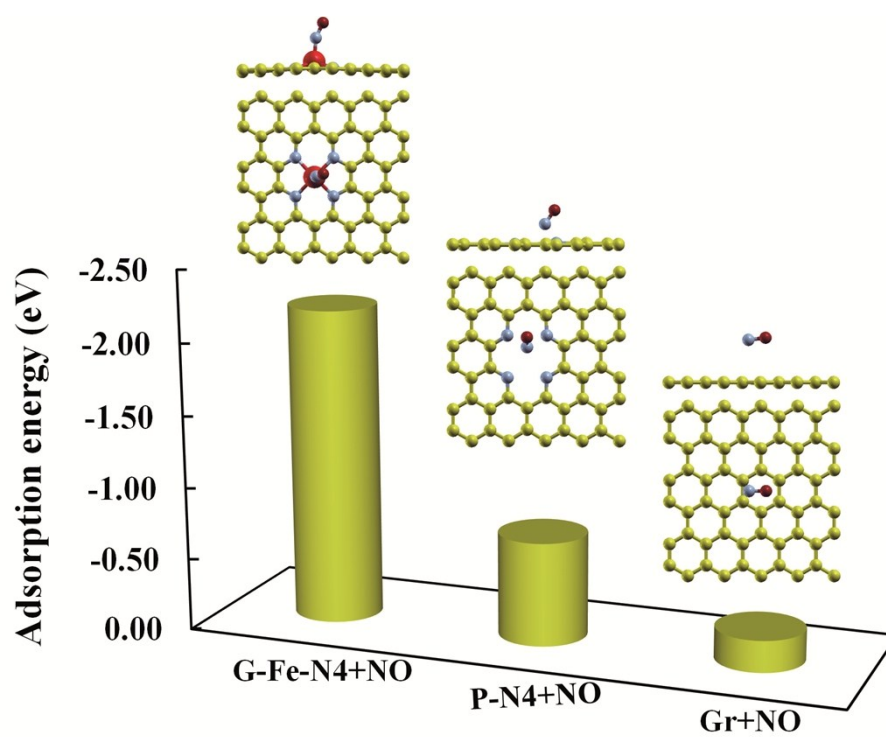

**Fig. S8** The 2D plot of the electron localization functions (ELFs) of  $\text{ACl}_1$ .

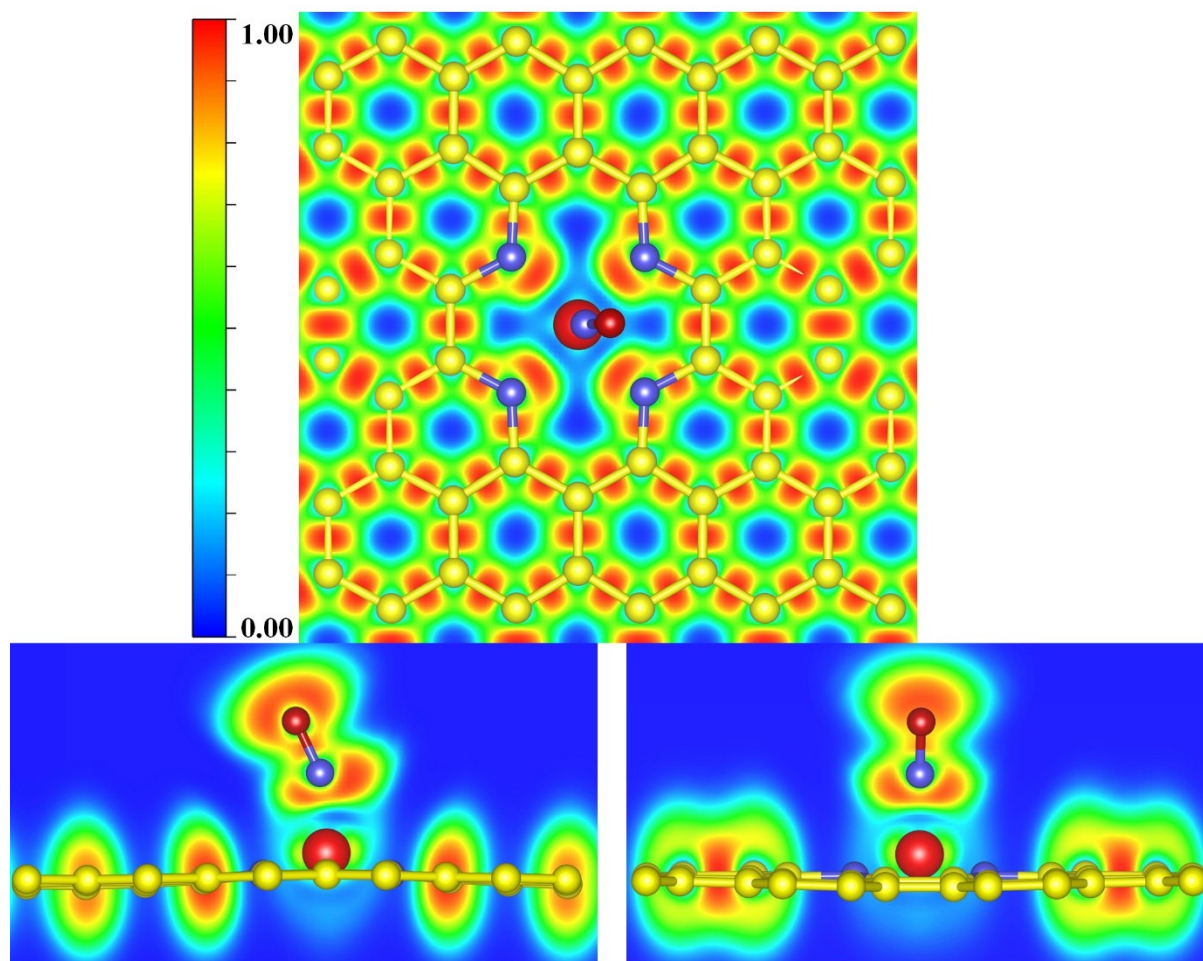

**Fig. S9** Calculated net charges from Löwdin population analysis of  $\text{ACI}_1$  (in e).

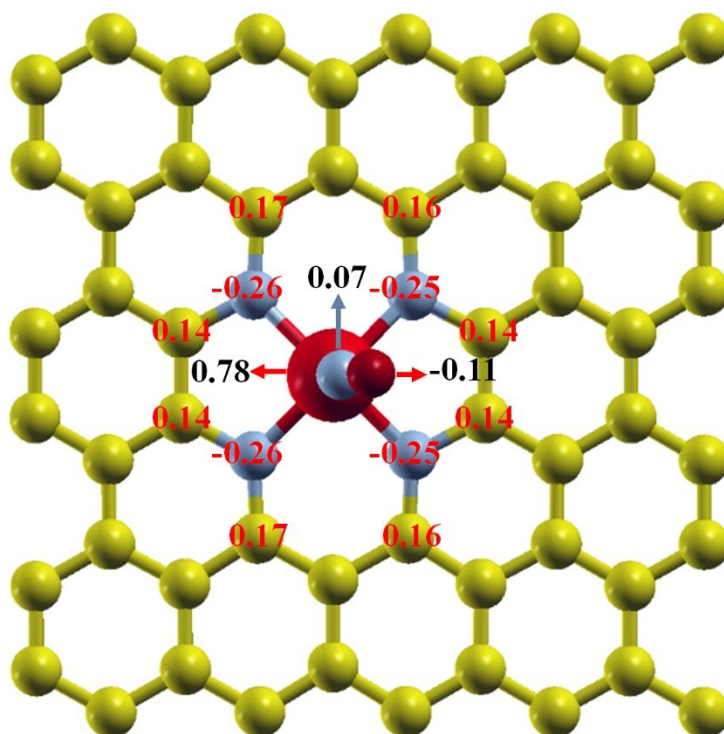





**Fig. S10** (a) Spin density plot including spin density in some atoms for (a) ACI<sub>1</sub> and (b) ACI<sub>5</sub>.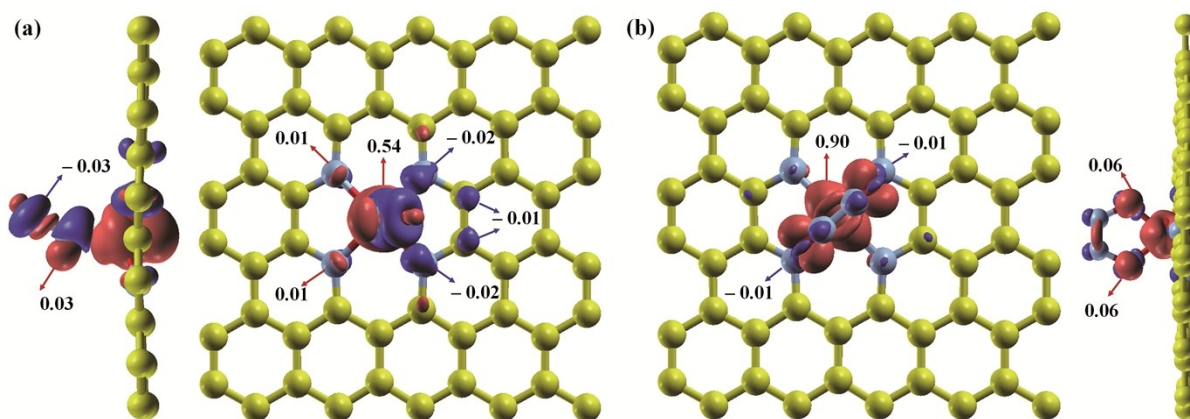**Fig. S11** Spin-resolved PDOS for (a) Fe atom ( $d_{z^2}, d_{zx}, d_{zy}$  and  $d_{xy}$  orbitals), (b) Fe atom ( $d_{x^2-y^2}$  orbital), (c) N atom of NO molecule ( $p_z, p_x$  and  $p_y$  orbitals), and (d) O atom of NO molecule ( $p_z, p_x$  and  $p_y$  orbitals) of ACI<sub>1</sub>. The arrows denote majority spin ( $\uparrow$ ) and minority spin ( $\downarrow$ ) channels.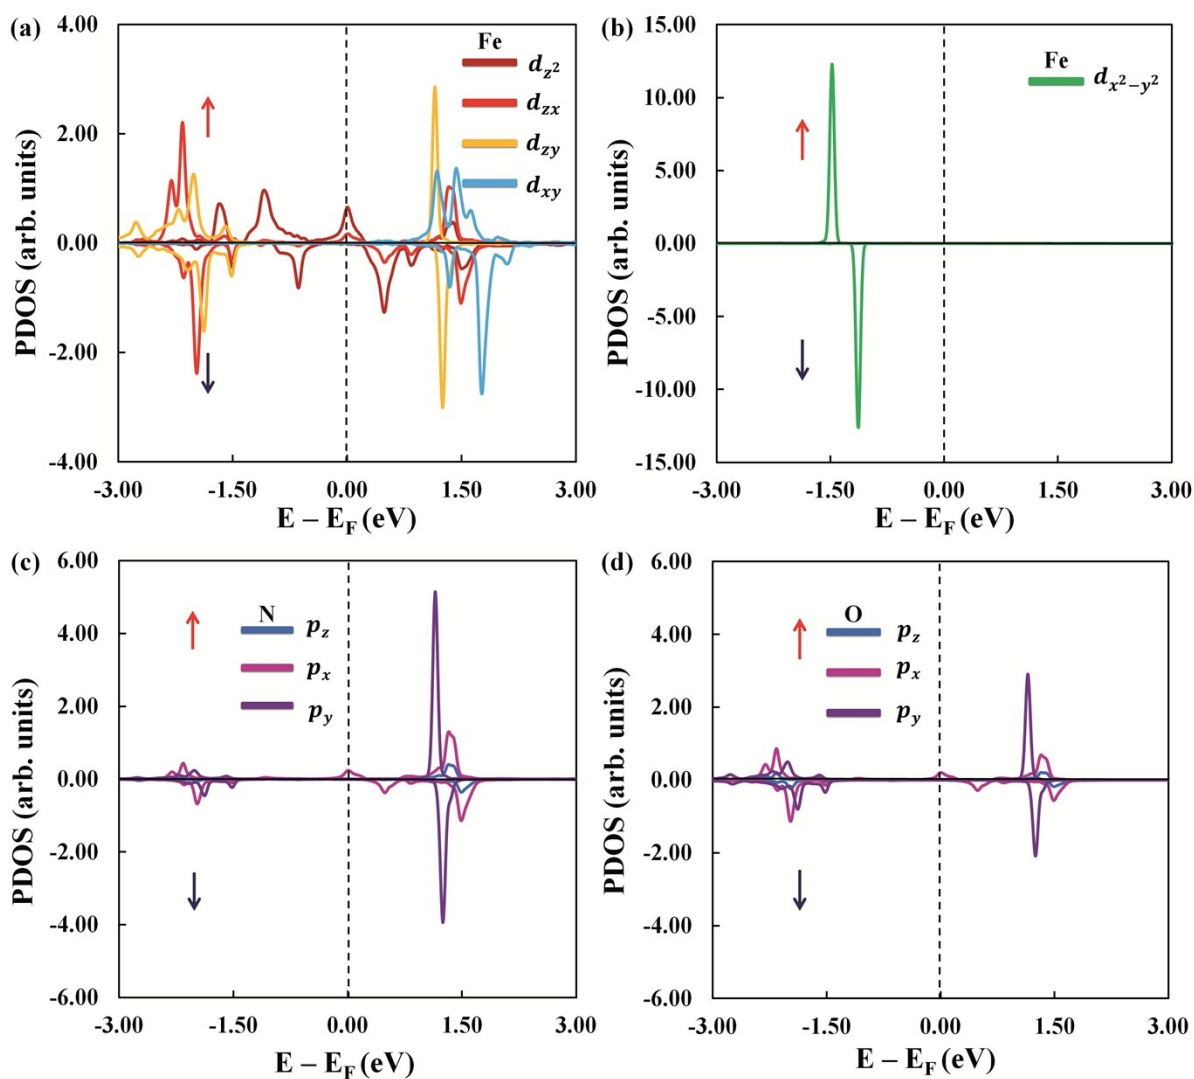

**Fig. S12** Six different initial orientations of acyclic cis-ONNO ( $^3A_1$ ) on the pristine G-Fe-N<sub>4</sub> surface.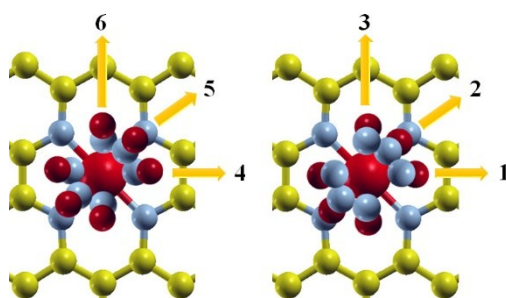**Fig. S13** Adsorption energy ( $E_{\text{ads}}$ ), dimer formation energy ( $E_{\text{dim}}$ ), and reconstruction energy ( $E_{\text{rec}}$ ) of adsorption complexes (ACII<sub>1</sub>-ACII<sub>5</sub>) with and without dispersion correction. (Adsorption energy and dimer formation energy are multiply by -1 for better representation).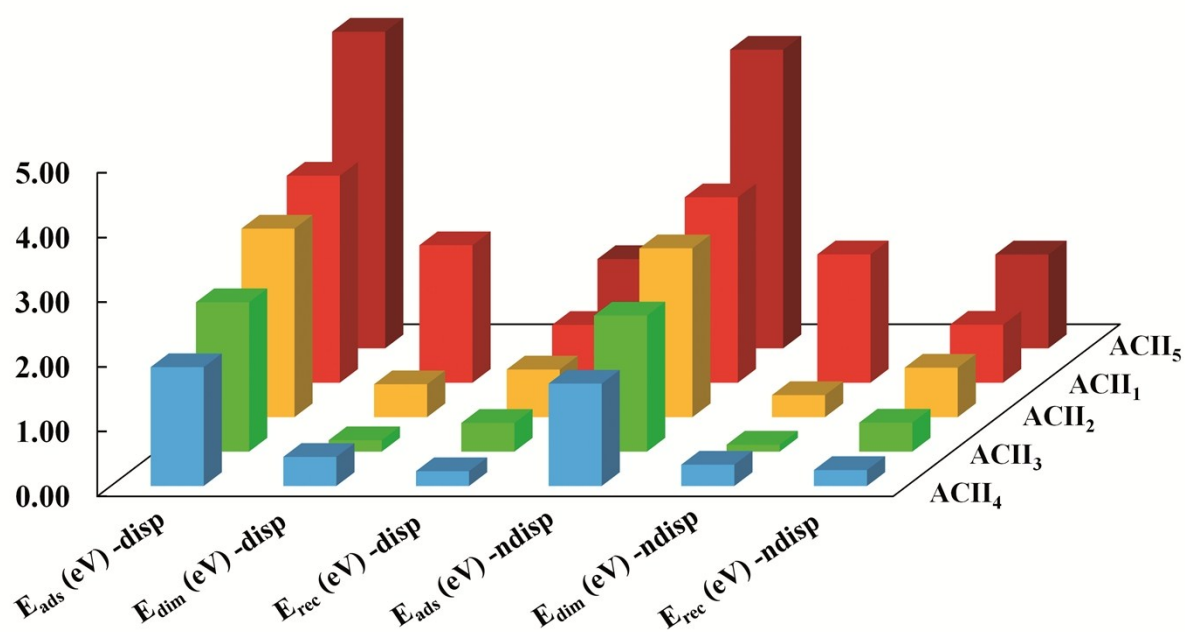



**Fig. S14** Spin-unpolarized (a) electronic band structure, (b) DOS, and (c) LDOS (Fe, N2, O2, N1 and O1 atoms) for ACII<sub>1</sub> and spin-polarized (d) LDOS (Fe, N2 and O2 atoms), (e) electronic band structure, and (f) DOS for ACII<sub>5</sub>. (The arrows denote majority spin ( $\uparrow$ ) and minority spin ( $\downarrow$ ) channels.)

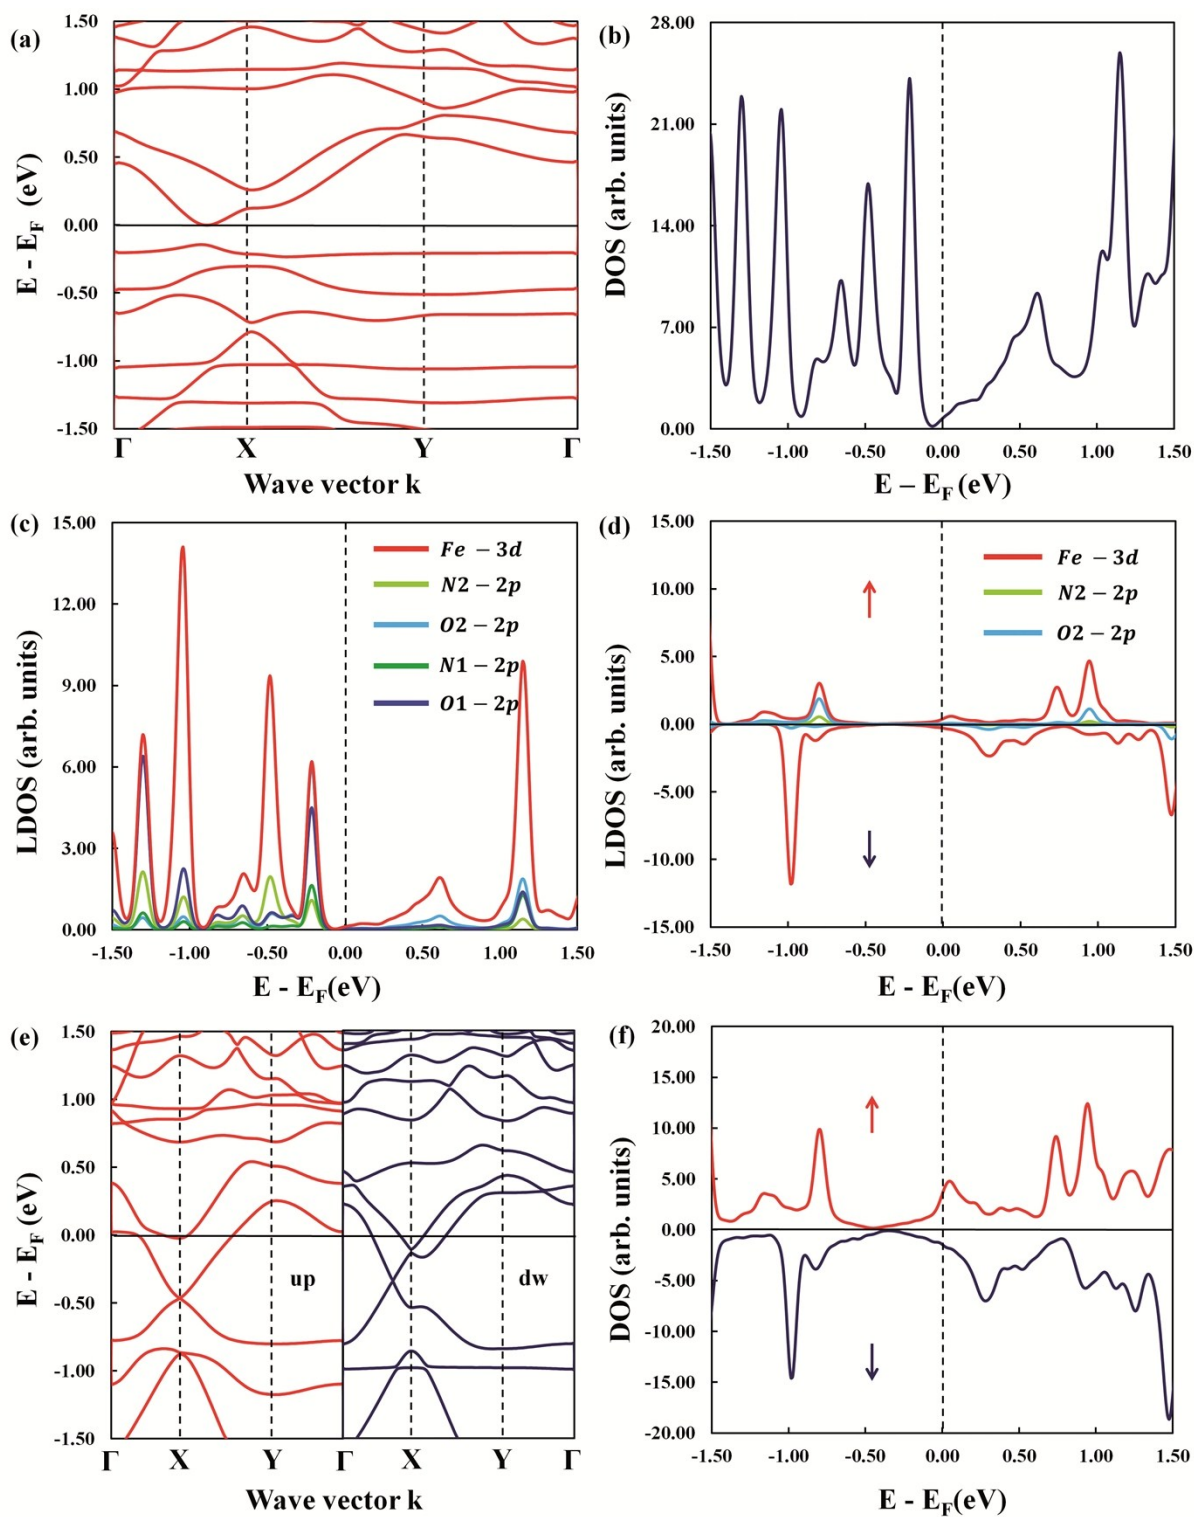

**Fig. S15** Spin-resolved PDOS for (a) Fe atom ( $d_{z^2}, d_{zx}, d_{zy}$  and  $d_{xy}$  orbitals), (b) Fe atom ( $d_{x^2-y^2}$  orbital), (c) N atom of NO molecule ( $p_z, p_x$  and  $p_y$  orbitals), and (d) O atom of NO molecule ( $p_z, p_x$  and  $p_y$  orbitals) for  $\text{AClI}_5$ . The up and down arrows denote majority spin ( $\uparrow$ ) and minority spin ( $\downarrow$ ) channels.

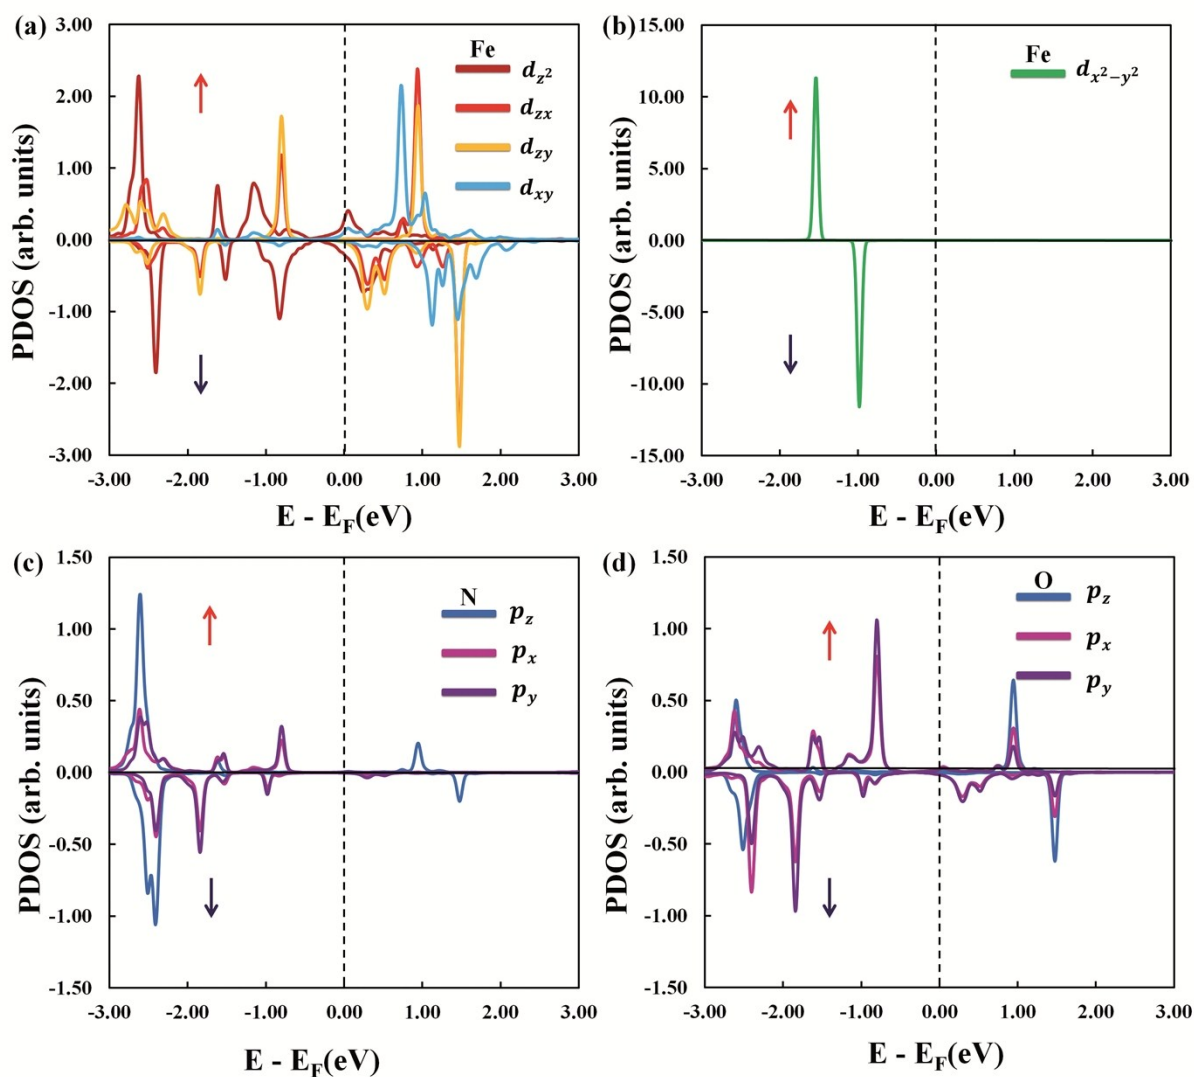

**Fig. S16** Energy profile for direct decomposition NO on the G-Fe-N4 surface. All energies are reported in eV relative to the initial state (IS<sub>a</sub>) and distances are in Å.

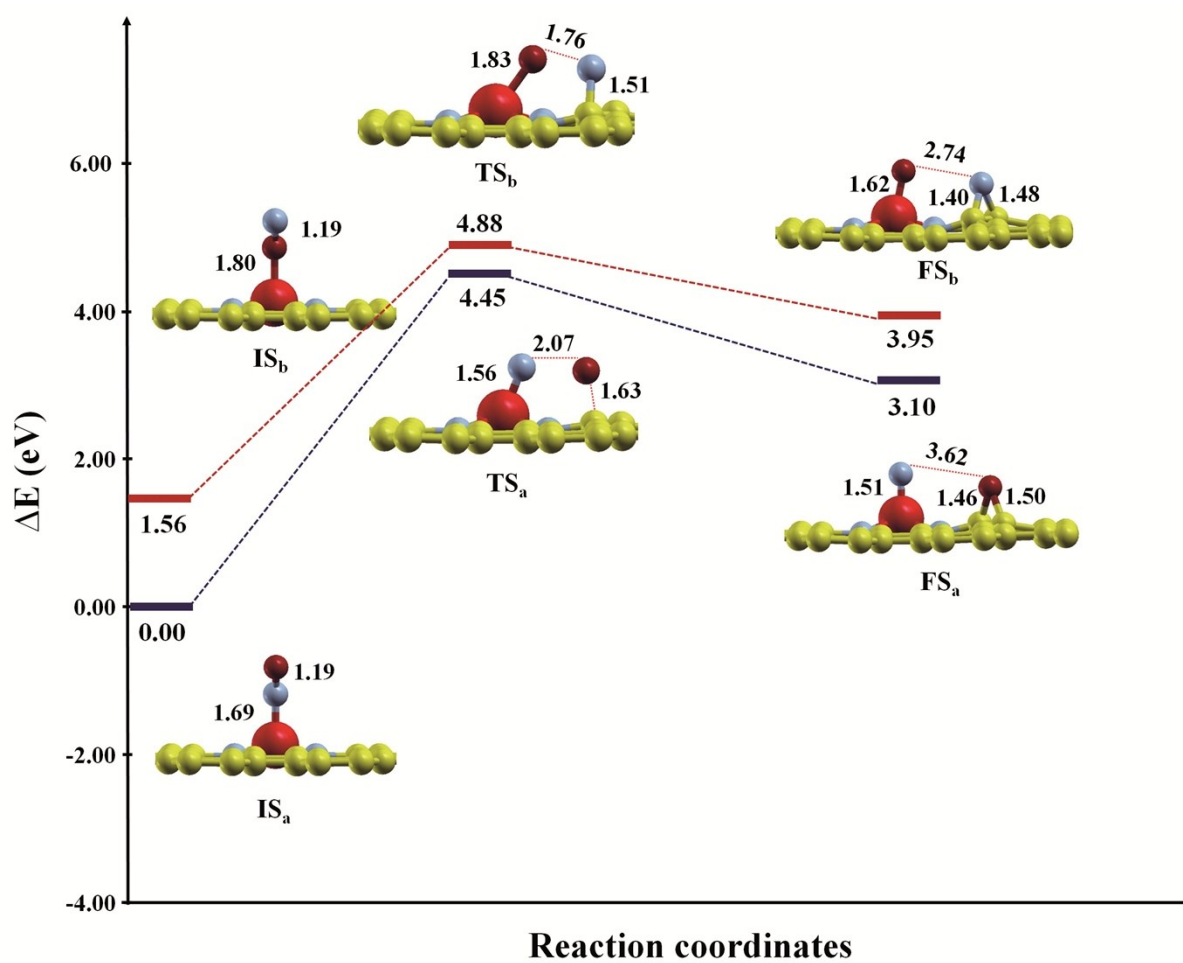

**Fig. S17** Energy profile for interconversion of  $ACII_1$  to  $ACII_5$ . All energies are reported in eV relative to the initial state ( $IS_c$ ).

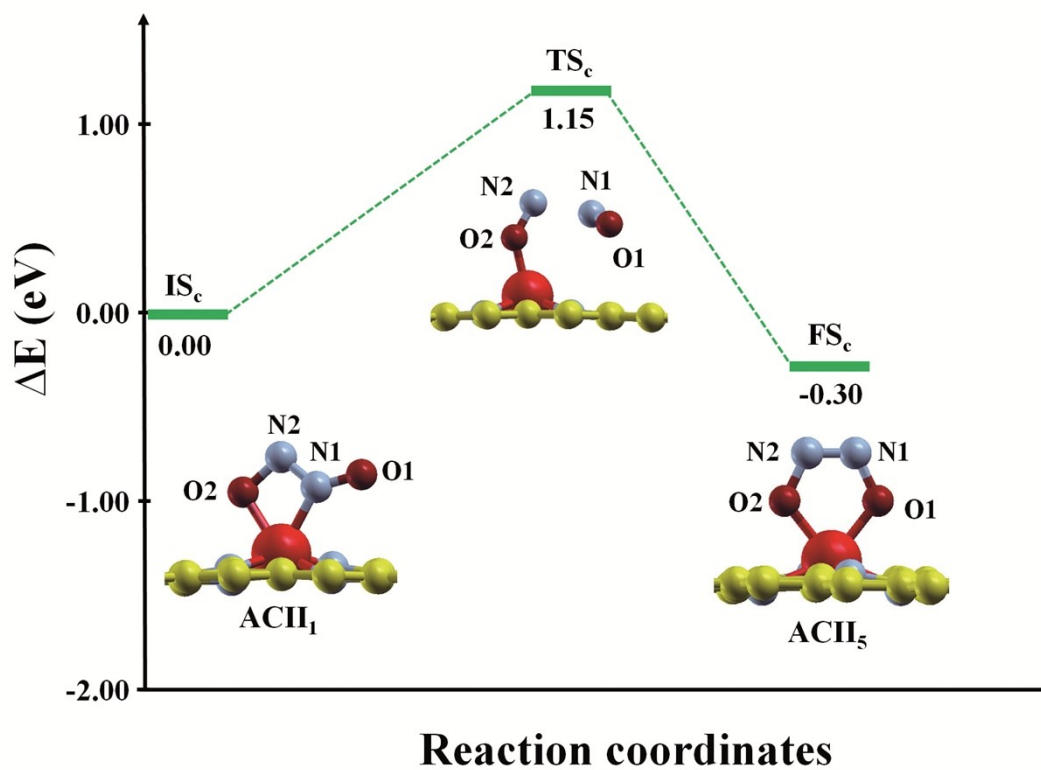

**Fig. S18** Energy profile for the recovery of G-Fe-N4 surface by (a) two NO and (b) N<sub>2</sub>O. All energies are reported in eV relative to the initial state (IS<sub>d</sub>) and distances are in Å. (IS, MS, TS and FS stand for initial, intermediate, transition and final state, respectively.)

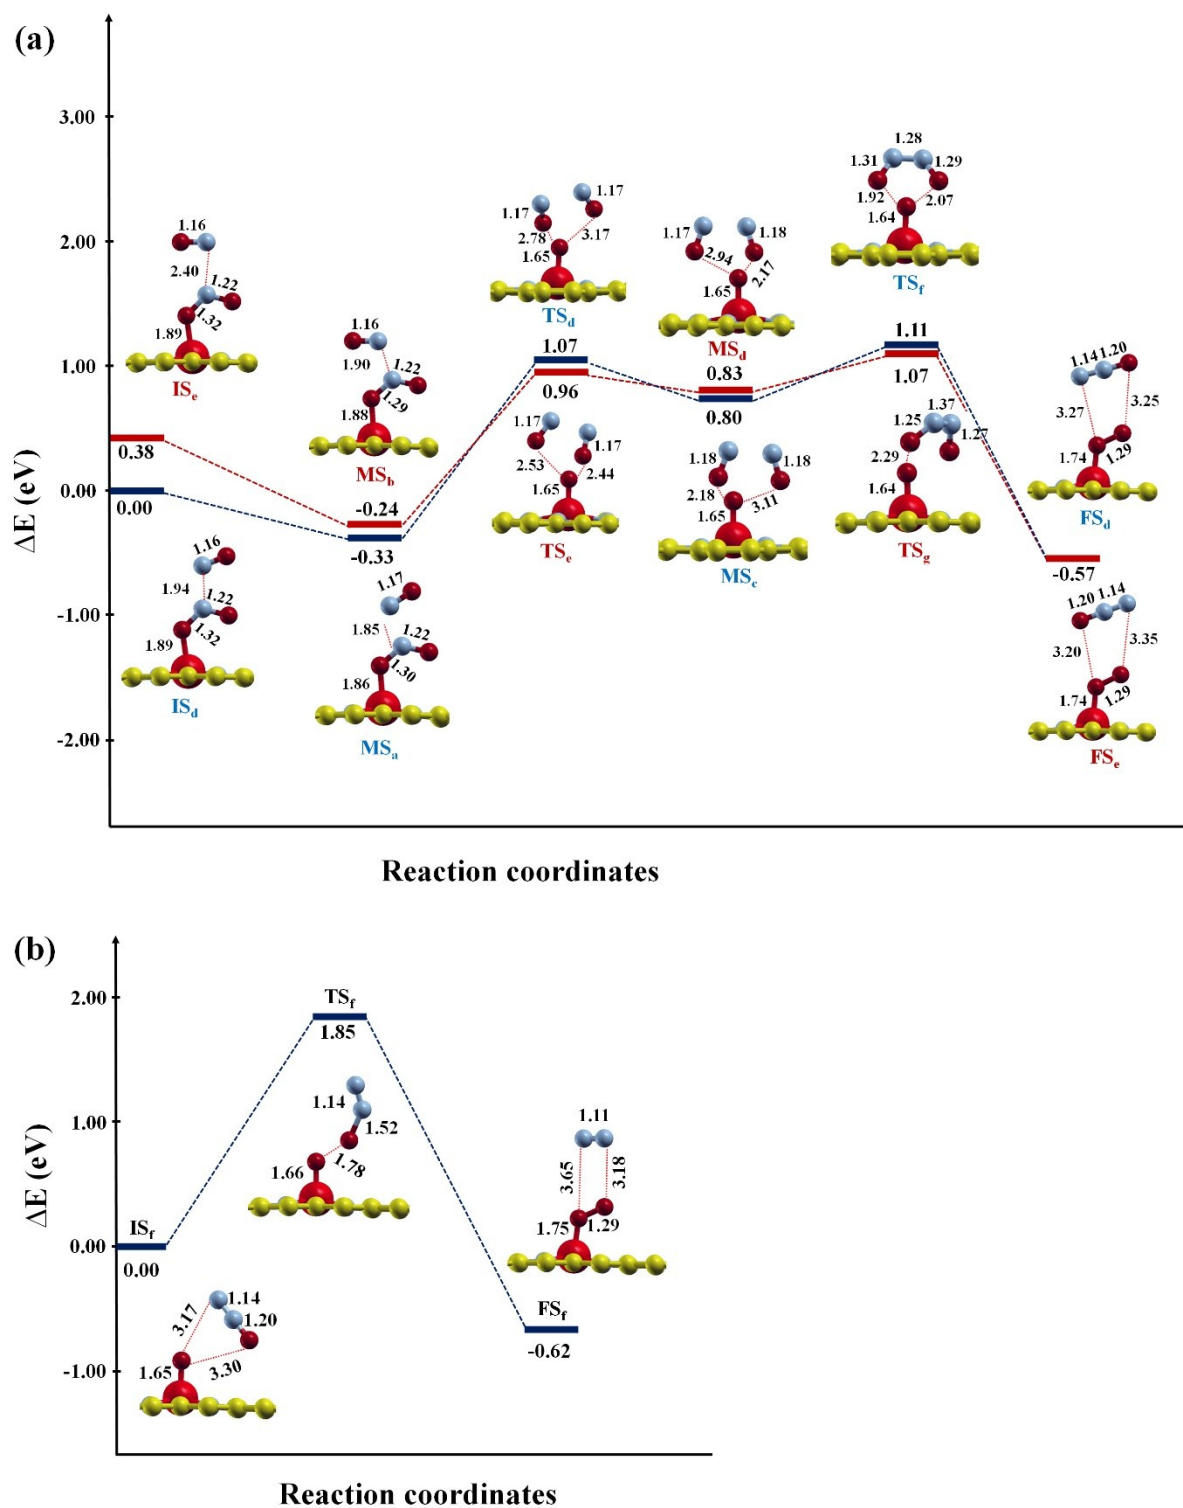

**Fig. S19** Energy profile for conversion of acyclic cis-ONNO ( $^3A_1$ ) to  $^1N_2O + ^3O$  in the gas phase from calculations at the TPSS/def2-tzvp level of theory. All energies are reported in eV relative to the initial state ( $IS_g$ ) and distances are in Å.

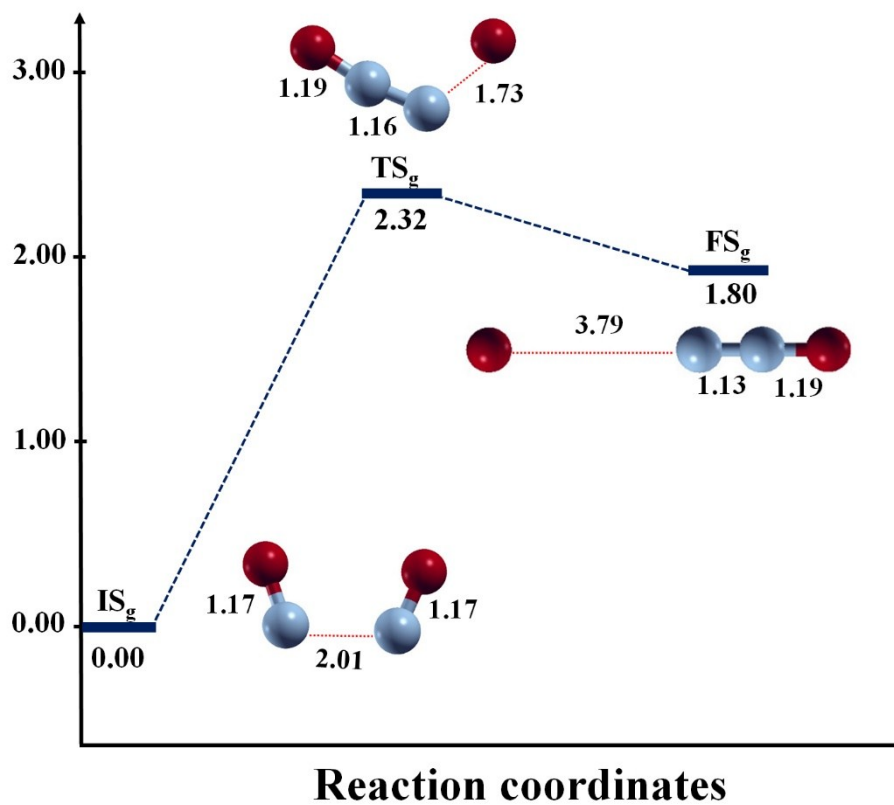

**Fig. S20** The complex electronic band structure of pristine graphene (G), for (a)  $k_x, k_y(0.0, 0.0)$ , (b)  $k_x, k_y(0.3333, 0.0)$ , and (c)  $k_x, k_y(0.5, 0.0)$ . This has been obtained using the following parameters:  $\text{epsproj}=0.15 \times 10^{-5}$ ,  $\text{ewind}=5.0$ , and  $\text{nz1}=5$  for different  $k_x, k_y$  (0, 0), (0.3333, 0) and (0.5, 0)

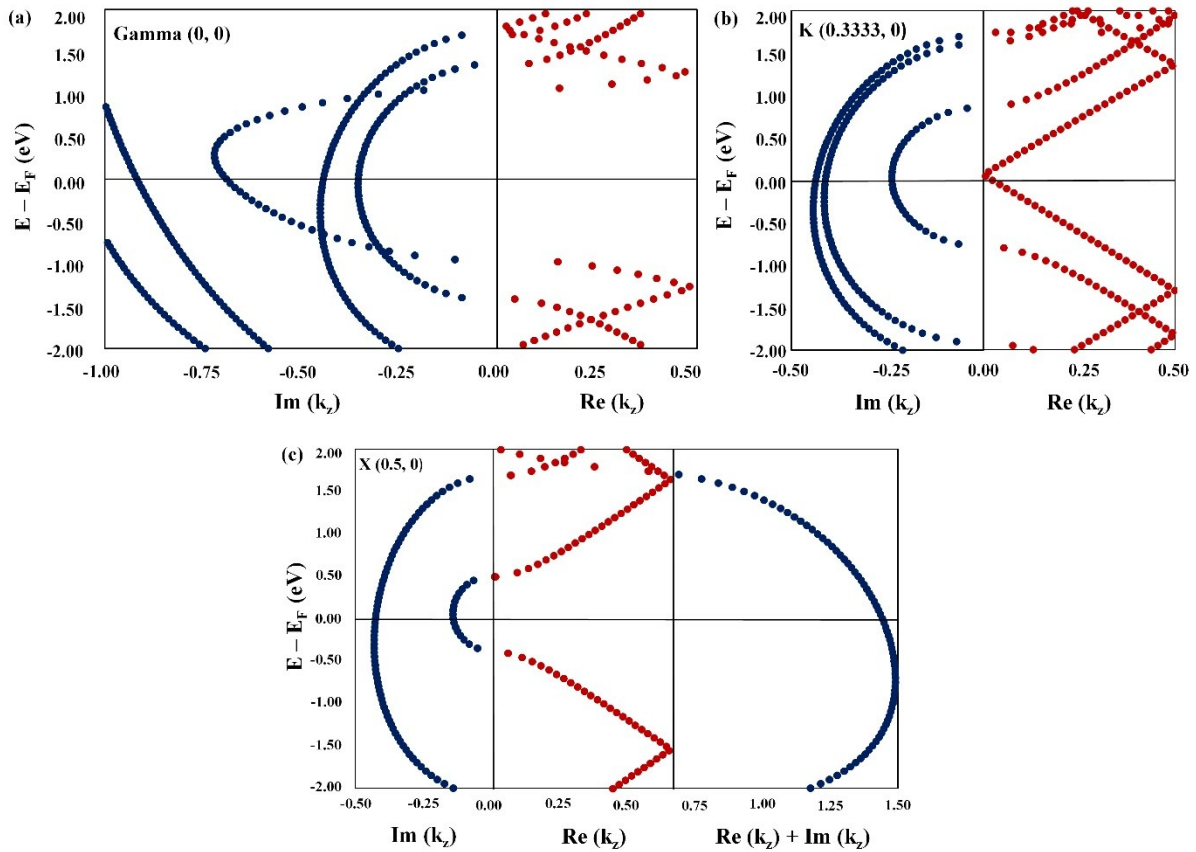

## References

---

- [1] S. Kattel, P. Atanassov, B. Kiefer, *J. Phys. Chem. C*, 2012, **116**, 8161-8166.
- [2] W. Orellana, *J. Phys. Chem. C*, 2013, **117**, 9812-9818.
- [3] H. A. Duarte, E. Proynov, D. R. Salahub, *J. chem. Phys.*, 1998, **109**, 26-35.
- [4] A. R. W. McKellar, J. K. G. Watson, B. J. Howard, *Mol. Phys.*, 1995, **86**, 273-286.
- [5] S. G. Kukolich, *J. Mol. Spectrosc.* 1983, **98**, 80-86.
- [6] A. F. Cotton, G. Wilkinson, M. Bochmann, C. A. Murillo, *Advanced inorganic chemistry*, Wiley, 6th edn, 1999.
- [7] K. P. Huber, G. Herzberg, *Constants of diatomic molecules, Molecular Spectra and Molecular Structure*, Springer, 1979, pp. 8-689.
